# Supplementary material
Source: publisher site journal article supplement (http://edge.sagepub.com/sites/default/files/Venkataraman%20Chapter%20Outline%2004%20Supplement.docx)
Supplement: Supplementary file 1 [file Venkataraman%20Chapter%20Outline%2004%20Supplement.docx]

Chapter Outline

# Chapter 4 Supplement: Reliability

***See pages: 150-157.***

Operations Profile: Computer Glitch Grounds United Airlines

Understanding Reliability

Estimating Reliability

Availability and Maintainability

Supplement Summary

Key Terms

Discussion and Review Questions

Solved Problems

Problems
